# Supplementary material
Source: PubMed Central journal article supplement (PMC3581894)
Supplement: 1300127110_sapp.pdf [file 1300127110_sapp.pdf]

## Supplementary Information

### Convergent gene loss following gene and genome duplications creates single-copy families in flowering plants

**Riet De Smet<sup>1,2</sup>, Keith L. Adams<sup>1,3</sup>, Klaas Vandepoele<sup>1,2</sup>, Marc C. E. Van Montagu<sup>1,2,\*</sup>, Steven Maere<sup>1,2</sup>, Yves Van de Peer<sup>1,2,\*</sup>**

<sup>1</sup> Department of Plant Systems Biology, VIB, Technologiepark 927, 9052 Ghent, Belgium

<sup>2</sup> Department of Plant Biotechnology and Bioinformatics, Ghent University, Technologiepark 927, 9052 Ghent, Belgium

<sup>3</sup> Department of Botany, University of British Columbia, 6270 University Blvd, Vancouver, BC, V6T 1Z4, Canada

\* Corresponding author

## **SI 1. Verification of single-copy status in *Brassica rapa*, *Solanum lycopersicum* and *Musa accuminata*, three species not included in the PLAZA dataset**

Protein coding sequences of all annotated *Brassica rapa* (Chinese cabbage), *Solanum lycopersicum* (tomato) and *Musa accuminata* (banana) genes were retrieved: for *Brassica rapa* from the Brassica Database ([http://solgenomics.net/organism/Solanum\\_lycopersicum/genome](http://solgenomics.net/organism/Solanum_lycopersicum/genome)), for *Solanum lycopersicum* from the Sol Genomics Network ([http://solgenomics.net/organism/Solanum\\_lycopersicum/genome](http://solgenomics.net/organism/Solanum_lycopersicum/genome)) and for *Musa accuminata* from the Banana genome consortium (<http://banana-genome.cirad.fr/>). A BLAST database was constructed based on all protein coding genes of the 17 angiosperm genomes in PLAZA 2.5 augmented with the *Brassica rapa*, *Solanum lycopersicum* and *Musa accuminata* genes. An all-against-all BLAST analysis was run for these 20 genomes using BLASTP. The output of this BLAST analysis was used to assign *Brassica rapa*, tomato and banana genes to the OrthoMCL orthologous groups (OGs) and to distinguish inparalogs from outparalogs in these genomes. First, for the mapping of the *Brassica*, tomato and banana genes to the OGs we considered for each query-gene in the respective genomes the top-scoring BLAST hits and calculated for the top-scoring BLAST hits the overlap with the existing OGs using the Jaccard coefficient (intersection/union). The query-gene was assigned to families that had a Jaccard coefficient exceeding 0.5. As such we could map 27,644 out of the 41,019 *Brassica rapa* genes to OGs, 20,537 out of the 34,727 tomato genes and 17,386 out of the 36,549 banana genes. To derive whether the *Brassica*, tomato and banana genes were single-copy in the families to which they were assigned we used a strategy similar to the Inparanoid method (1). If for a certain *Brassica*, tomato or banana query gene, a gene from the same genome ranked higher in the BLAST output than genes from the other genomes, it was considered to be an inparalog, otherwise it was considered to be an outparalog. Using this strategy we could assign 2610 *Brassica* genes, 2722 tomato genes and 2616 banana genes to (mostly) single-copy OGs. For tomato the large majority (83% or 2267 out of 2722) of the genes assigned to these (mostly) single-copy OGs were single-copy, for *Brassica rapa* this was 66% (1734 out of 2610) and for banana this was 71% (1848 out of 2616) (Fig. S1). The lower percentage of single-copy genes identified for *Brassica rapa* and banana can be explained by the higher number of WGD events that has occurred in these organisms (2, 3).

### ***Motivation for the choice of Jaccard threshold***

For the assignment of the *Brassica rapa*, tomato and banana genes to the OrthoMCL OGs we rely on a cut-off on the Jaccard coefficient to decide whether the query-gene shows BLAST-similarity to a sufficient number of genes within the OGs. We aim to set this cutoff sufficiently high to ensure that the query-gene shows similarity to most of the genes in the OrthoMCL OGs. On the other hand, a too strict threshold might result in almost none of the genes being assigned to any of the OGs. To decide on what specific value of the cutoff to use we argued that since the single-copy genes are generally

well-conserved, with representatives in almost all of the 17 angiosperm genomes in the OGs, these genes will also most likely have representatives in the three additional angiosperm genomes (therefore not necessarily as a single-copy). For a Jaccard coefficient exceeding 0.5 we observe that the number of single-copy OGs with representatives in any of these 3 genomes start to drop more drastically (Fig. S2, the combined bar of single-copy and not single-copy genes). Hence, we choose this Jaccard coefficient threshold to assign genes to OGs.

## **SI 2. Phylogenetic approach to verify single-copy status**

To validate the single-copy status of the obtained orthologous groups and to assess the possibility that paralogs were erroneously excluded from the OGs which would lead to false positive predictions, we developed a phylogenetic approach. First, we expanded all the single-copy OGs (strictly and mostly) with genes that might have been erroneously excluded: i.e. genes with a high BLAST similarity score to the OG genes that were not included in the OGs themselves. For each of the obtained expanded OGs, gene trees were constructed as follows. Multiple sequence alignments of protein sequences were constructed for each orthologous group using the MUSCLE method (4). Poorly aligned and divergent regions were removed from the multiple sequence alignment using the same customized scripts developed to process the multiple sequence alignments of the PLAZA 2.5 families (5). From these alignments phylogenetic trees were constructed based on the maximum likelihood (ML) approach using the PhyML software (6). A neighbor-joining tree as constructed by BioNJ was used as starting topology. This tree topology was optimized in a maximum likelihood framework using the WAG evolutionary model. The final topology was obtained from 100 bootstrap samples. NOTUNG 2.6 was used to root the trees, using the same species tree as in (7).

The phylogenetic tree of each of these 'expanded OGs' was analyzed to assess whether the expanded gene set formed an outparalogous cluster (i.e. they derived from a duplication which took place before the angiosperm ancestor arose) with respect to the original OG or included some previously missed inparalogs (Fig. S3). In the former case the predicted OG was assumed to be a true strictly or mostly single-copy OG as its single-copy status could be confirmed by the phylogenetic validation step. In case of the latter (missing inparalogs), if the gene copy number in the expanded OG conformed to the initial criteria (no duplicates for more than three species) the OG was assumed to be an mostly single-copy OG, otherwise it was classified as being an invalid single-copy OG and removed from the analysis (see Methods for details). In total, for 2840 (2663 mostly single copy + 177 strictly single-copy) of the 3880 initially observed strictly and mostly single-copy OGs, the single-copy status could be confirmed.

## **SI 3. Simulations show that the number of identified single-copy OGs exceeds random expectation**

To determine whether the observed number of single-copy families could have been obtained by random gene duplication/loss dynamics, we first determined the fraction of gene loss and duplication along each branch of the species tree. The species tree used was the same as the one in

(7). Using this species tree, for each PLAZA OG we performed gene tree-species tree reconciliation using NOTUNG2.6 (8) to derive the predicted number of duplication and loss events along each branch. This procedure was repeated for each PLAZA OG dating back to the angiosperm ancestor and the results were compiled to obtain estimates of the relative number of duplications/losses/no changes that occurred along each branch of the species tree. We ran NOTUNG in the 'rearrange' mode to allow for rearrangements of branches with a low bootstrap support. Incorrect gene trees often result in predictions of duplication events near the root of the species tree, followed by a large number of losses at the tips (9). Since the predictions of these duplication and associated loss events are likely to be due to an inaccurate gene tree rather than presenting a real evolutionary phenomenon, we assessed the 'reliability' of each predicted duplication node using the duplication consistency score (10). Typically, such predicted duplication nodes are very imbalanced: i.e. there is little or no overlap in the species on the daughter branches. The duplication consistency score exactly assesses this imbalance by comparing the overlap in species of the daughter branches with their union. Because these problems often arise due to one misplaced branch, we pruned branches from the gene tree associated with duplication consistency scores  $< 0.6$  and performed tree reconciliation again for the pruned tree. Duplications and loss events obtained for this pruned tree are then further used for the simulation. The end result of this procedure is a species tree with for each branch an estimated distribution of the predicted number of copy number changes a gene would undergo along that branch (Fig. S4A). To obtain the expected number of single-copy families under the assumption of random gene loss we evolved 9513 ancestral angiosperm genes, i.e. the same as the number of OGs that was analyzed, along this species tree according to the estimated copy number change distributions obtained for each branch. Hence, we assume that gene duplication and loss along each branch is independent (assumption of random gene loss). We repeated this procedure 100,000 times and in each round calculated the number of single-copy OGs to obtain an estimate of the expected number of single-copy OGs under the assumption of random gene loss (Fig. S4B). A p-value was calculated as the proportion of simulations in which the number of simulated OGs that is single-copy exceeds or is equal to the number of single-copy OGs that was observed.

***Assessing the influence of the number of genomes used on the expected number of single-copy OGs***

To assess how the number of expected single-copy OGs evolves if one adds more genomes we used the above simulation strategy to estimate the number of expected single-copy OGs based on respectively 14, 12, 9, 6 and 3 genomes. In this analysis we used the same estimates of the duplication and loss rates along the branches of the species tree as calculated above, but the simulation itself was based on a randomly sampled subset of the 17 genomes. For each of the number of genomes assessed we repeated the entire simulation process 20 times, each time for a different set of sampled genomes (1000 runs for each sample). The results are shown in Fig. S5. We observe that while there is a gradual increase in the expected number of single-copy OGs with a decreasing number of genomes, the specific set of genomes sampled plays a larger role than the

number of genomes sampled. Especially, not including genomes that are still highly duplicated, such as soybean and apple, seems to influence the obtained number of single-copy OGs substantially.

#### **SI 4. Functional and evolutionary characterization single-copy genes**

##### ***Functional enrichment analysis***

The BINGO 2.44 Cytoscape plugin (11) was used to calculate functional enrichment values for the set of single-copy gene. We used a p-value threshold of 0.05 and p-values were corrected for multiple testing using the Benjamini and Hochberg method (12).

##### ***Phylogenetic distribution***

To assess phylogenetic conservation of the single-copy genes in other organisms we obtained gene homologous relationships between the *A. thaliana* genes and 12 metazoa and 6 fungi from Homologene (13). The species in Homologene were subdivided into fungi and Metazoa. An *A. thaliana* gene was considered to be conserved in either of these both groups if it had homologous genes in 70% of the species in that phylostratum. P-values for phylogenetic conservation were calculated by a hypergeometric test with a multiple testing correction by the Benjamini and Hochberg method (12).

Of the 2986 *A. thaliana* single-copy genes, 2661 are found in the HomoloGene database. Remarkable is the high number of *A. thaliana* single-copy genes with metazoan homologs (Table S3): nearly 20% (675/3514) ( $p < 2.22e-16$ , hypergeometric test) of the *A. thaliana* genes with metazoan homologs belong to single-copy OGs.

##### ***Gene expression analysis***

Pre-processed *A. thaliana* gene expression data measuring expression in different organs and different developmental stages was taken from CORNET (14). To obtain absolute gene expression levels, for each gene the geometric mean of its expression level was calculated across all 425 conditions.

To calculate gene expression breadth we first subdivided the arrays into different organ sets using the Plant Ontology associated with each array in CORNET. To ascertain that gene expression patterns in the different organs was comparable, a PCA plot of the expression data was made and showed clustering of the conditions according to the assigned organ. For each condition we fitted a bimodal distribution using the R mixtools package to classify genes as being expressed or not expressed in a certain condition (15). A gene was considered as being expressed in an organ if it was expressed in at least 70% of all the conditions measuring expression in the specific organ. Expression breadth for each gene is then calculated as the number of organs in which the gene is expressed.

##### ***Sequence conservation***

$K_a$  and  $K_s$  values for *A. thaliana* and *A. lyrata* gene pairs were obtained from the PLAZA 2.5 database (4, 13). Briefly, coding sequences were aligned using the CLUSTALW version 1.83 alignment tool (16).

From this alignment ambiguously aligned residues were stripped. The number of synonymous substitutions per synonymous site ( $K_s$ ) and the number of nonsynonymous substitutions per nonsynonymous site ( $K_a$ ) were estimated using the codeml package in PAML (17), with the Goldman & Yang (1994) model (18).

For the calculation of the Codon Adaptation Index (CAI), the CodonW package (<http://codonw.sourceforge.net/>) was used. We first used the correspondence analysis included in this package to select a reference set of *A. thaliana* genes that has highly biased codon usage. This reference set was then used to calculate the CAI for all genes according to (19).

### ***Properties of strictly single-copy genes***

We performed the above analyses (functional enrichment calculations, gene expression analysis and sequence conservation analyses) also separately on the set of 177 strictly single-copy genes (Table S4).

## References

1. Remm M, Storm CE, & Sonnhammer EL (2001) Automatic clustering of orthologs and in-paralogs from pairwise species comparisons. *J Mol Biol* 314(5):1041-1052.
2. Wang X, *et al.* (2011) The genome of the mesopolyploid crop species *Brassica rapa*. *Nat Genet* 43(10):1035-1039.
3. D'Hont A, *et al.* (2012) The banana (*Musa acuminata*) genome and the evolution of monocotyledonous plants. *Nature* 488(7410):213-217.
4. Edgar RC (2004) MUSCLE: multiple sequence alignment with high accuracy and high throughput. *Nucleic Acids Res* 32(5):1792-1797.
5. Proost S, *et al.* (2009) PLAZA: a comparative genomics resource to study gene and genome evolution in plants. *Plant Cell* 21(12):3718-3731.
6. Guindon S & Gascuel O (2003) A simple, fast, and accurate algorithm to estimate large phylogenies by maximum likelihood. *Syst Biol* 52(5):696-704.
7. Van Bel M, *et al.* (2012) Dissecting plant genomes with the PLAZA comparative genomics platform. *Plant Physiol* 158(2):590-600.
8. Durand D, Halldorsson BV, & Vernet B (2006) A hybrid micro-macroevolutionary approach to gene tree reconstruction. *J Comput Biol* 13(2):320-335.
9. Hahn MW (2007) Bias in phylogenetic tree reconciliation methods: implications for vertebrate genome evolution. *Genome Biol* 8(7):R141.
10. Vilella AJ, *et al.* (2009) EnsemblCompara GeneTrees: Complete, duplication-aware phylogenetic trees in vertebrates. *Genome Res* 19(2):327-335.
11. Maere S, Heymans K, & Kuiper M (2005) BiNGO: a Cytoscape plugin to assess overrepresentation of gene ontology categories in biological networks. *Bioinformatics* 21(16):3448-3449.
12. Benjamini Y & Hochberg Y (1995) Controlling the False Discovery Rate - a Practical and Powerful Approach to Multiple Testing. *Journal of the Royal Statistical Society Series B-Methodological* 57(1):289-300.
13. Sayers EW, *et al.* (2012) Database resources of the National Center for Biotechnology Information. *Nucleic Acids Res* 40(Database issue):D13-25.
14. De Bodt S, Hollunder J, Nelissen H, Meulemeester N, & Inze D (2012) CORNET 2.0: integrating plant coexpression, protein-protein interactions, regulatory interactions, gene associations and functional annotations. *New Phytol* 195(3):707-720.
15. Hebenstreit D, *et al.* (2011) RNA sequencing reveals two major classes of gene expression levels in metazoan cells. *Mol Syst Biol* 7:497.
16. Oliver T, Schmidt B, Nathan D, Clemens R, & Maskell D (2005) Using reconfigurable hardware to accelerate multiple sequence alignment with ClustalW. *Bioinformatics* 21(16):3431-3432.
17. Yang ZH (1997) PAML: a program package for phylogenetic analysis by maximum likelihood. *Computer Applications in the Biosciences* 13(5):555-556.
18. Goldman N & Yang Z (1994) A codon-based model of nucleotide substitution for protein-coding DNA sequences. *Mol Biol Evol* 11(5):725-736.
19. Sharp PM & Li WH (1987) The codon Adaptation Index--a measure of directional synonymous codon usage bias, and its potential applications. *Nucleic Acids Res* 15(3):1281-1295.

Supplementary figures

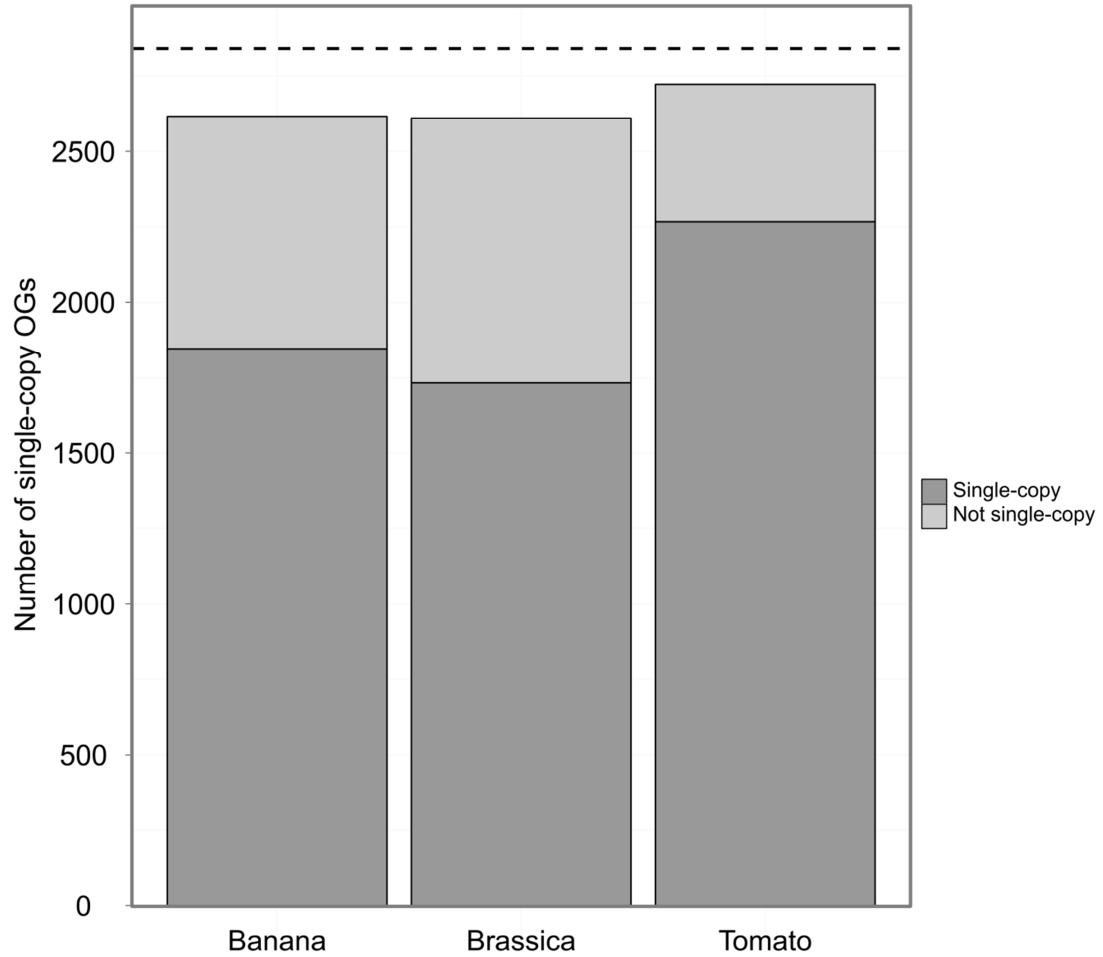

Fig. S1. Single-copy status of identified OGs is confirmed in *Brassica rapa*, tomato and banana. The bar plot represents the number of (mostly) single-copy OGs for which single-copy status could be confirmed (dark grey) in *Brassica*, tomato and banana. The proportion of (mostly) single-copy OGs for which single-copy status could not be confirmed, i.e. inparalogs were detected in the OG, is shown in light grey. The black dotted horizontal line represents the number of (mostly) single-copy OGs retrieved from the PLAZA database.



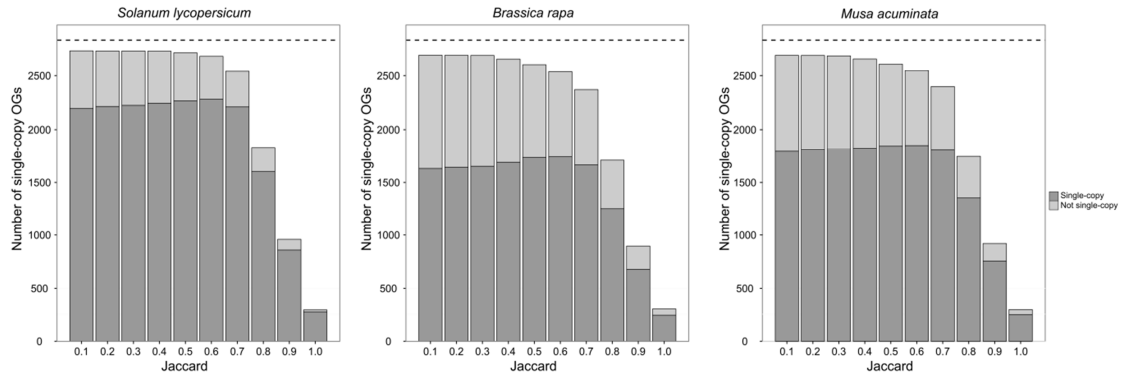

Fig. S2. Number of genes in tomato (*Solanum lycopersicum*), *Brassica rapa* and banana (*Musa acuminata*) that are assigned to the OrthoMCL OGs for different values of the Jaccard coefficient. Genes that are assigned to an OG (y-axis) are separated into genes that are single-copy in the species ('Single-copy') and those that seem to have duplicates for that particular OG ('Not single-copy'). The black dotted horizontal line represents the number of (mostly) single-copy OGs retrieved from the PLAZA database.

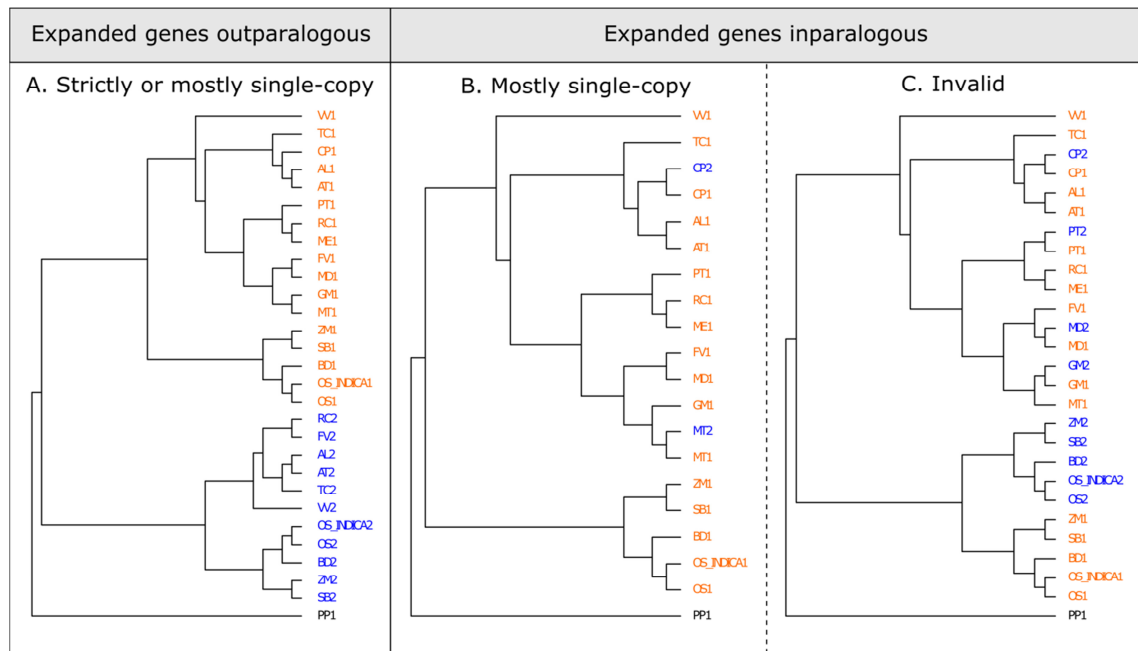

Fig. S3. Classification of expanded orthologous groups. Orthologous groups derived from PLAZA (in orange) were expanded with mutual best BLAST hits (in blue). Outgroup genes are colored in black. Maximum likelihood trees from these expanded orthologous groups were constructed to assess whether the additional genes were outparalogs to the original genes in the PLAZA orthologous groups. Based on this phylogenetic validation step, orthologous groups retained their original classification as strictly or mostly single-copy (A) if all expanded genes were outparalogs, they were classified as mostly single-copy (B) if the presence of inparalogs after expansion did not increase the number of duplicates to more than three species, and invalid (C) if after expansion the orthologous group did contain duplicates for more than three species. See text for details. (Abbreviations: VV = *Vitis vinifera*, TC = *Theobroma cacao*, CP= *Carica papaya*, AL = *Arabidopsis lyrata*, AT = *Arabidopsis thaliana*, PT = *Populus trichocarpa*, RC = *Ricinus communis*, ME = *Manihot esculenta*, FV = *Fragaria vesca*, MD = *Malus domestica*, GM = *Glycine max*, MT = *Medicago trunculata*, ZM = *Zea mays*, SB = *Sorghum bicolor*, BD = *Brachypodium distachyon*, OS\_INDICA = *Oryza sativa ssp. indica*, OS = *Oryza sativa ssp. japonica*).

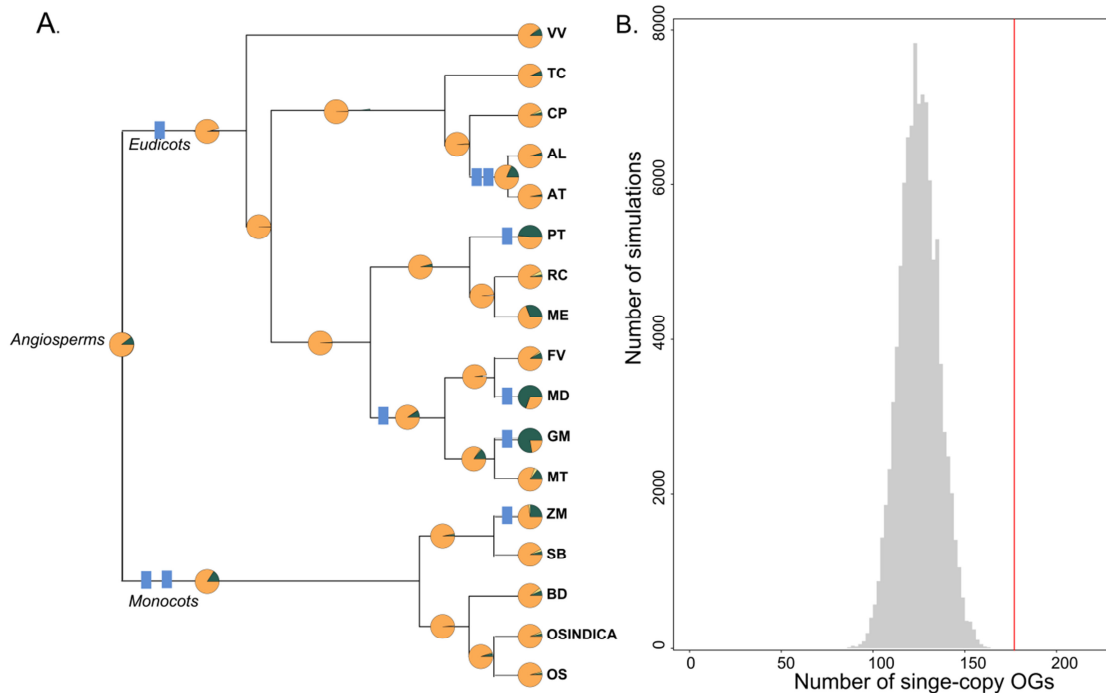

Fig. S4. Simulation of the expected number of single-copy families. (A) Species tree with pie charts on the branches denoting estimated fractions of duplications (green), losses (yellow) and no change (orange), as estimated from the PLAZA OGs using tree reconciliation. Blue rectangles represent known WGD events (B) The number of expected (grey bar) single-copy families in 100,000 simulations of gene family evolution along the phylogenetic tree represented in A. The observed number of single-copy families is represented by the red vertical line. (Abbreviations: VV = *Vitis vinifera*, TC = *Theobroma cacao*, CP= *Carica papaya*, AL = *Arabidopsis lyrata*, AT = *Arabidopsis thaliana*, PT = *Populus trichocarpa*, RC = *Ricinus communis*, ME = *Manihot esculenta*, FV = *Fragaria vesca*, MD = *Malus domestica*, GM = *Glycine max*, MT = *Medicago trunculata*, ZM = *Zea mays*, SB = *Sorghum bicolor*, BD = *Brachypodium distachyon*, OS\_INDICA = *Oryza sativa ssp. indica*, OS = *Oryza sativa ssp. japonica*).

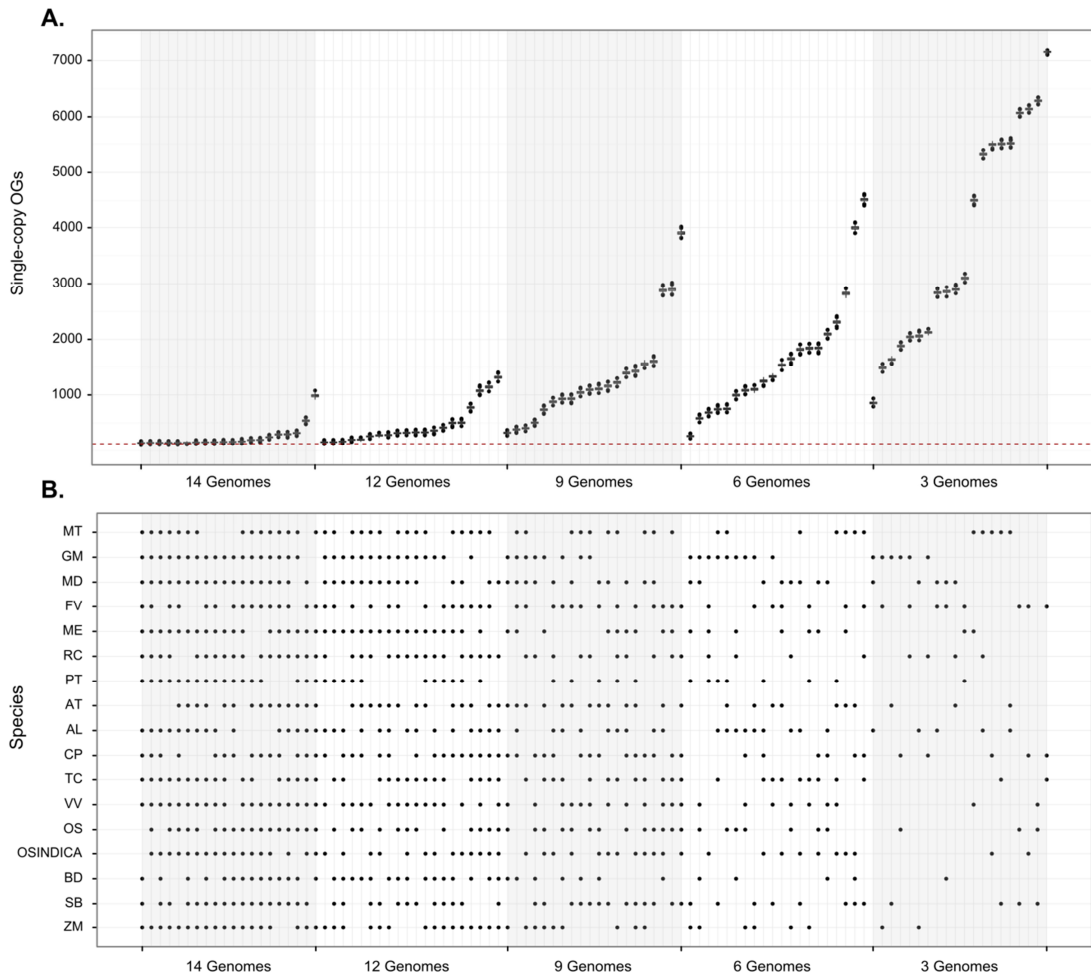

Fig. S5. Assessment of how the expected number of strictly single-copy OGs changes with a decreasing number of genomes. Panel A represents the distributions (boxplots) of the expected number of single-copy OGs for 1000 simulations of gene loss along the species tree in Fig. S4A for respectively 14, 12, 9, 6 and 3 genomes. The y-axis refers to the number of expected single-copy OGs obtained averaged over 1000 simulation, while the x-axis represents the different genome samples to which the simulation was applied (cfr. panel B). Panel B represents the specific set of genomes sampled. The red dotted line in panel A represents the median number of expected strictly single-copy OGs obtained for 17 genomes (Fig. S4B). The same abbreviations as in Fig. S4 were used.

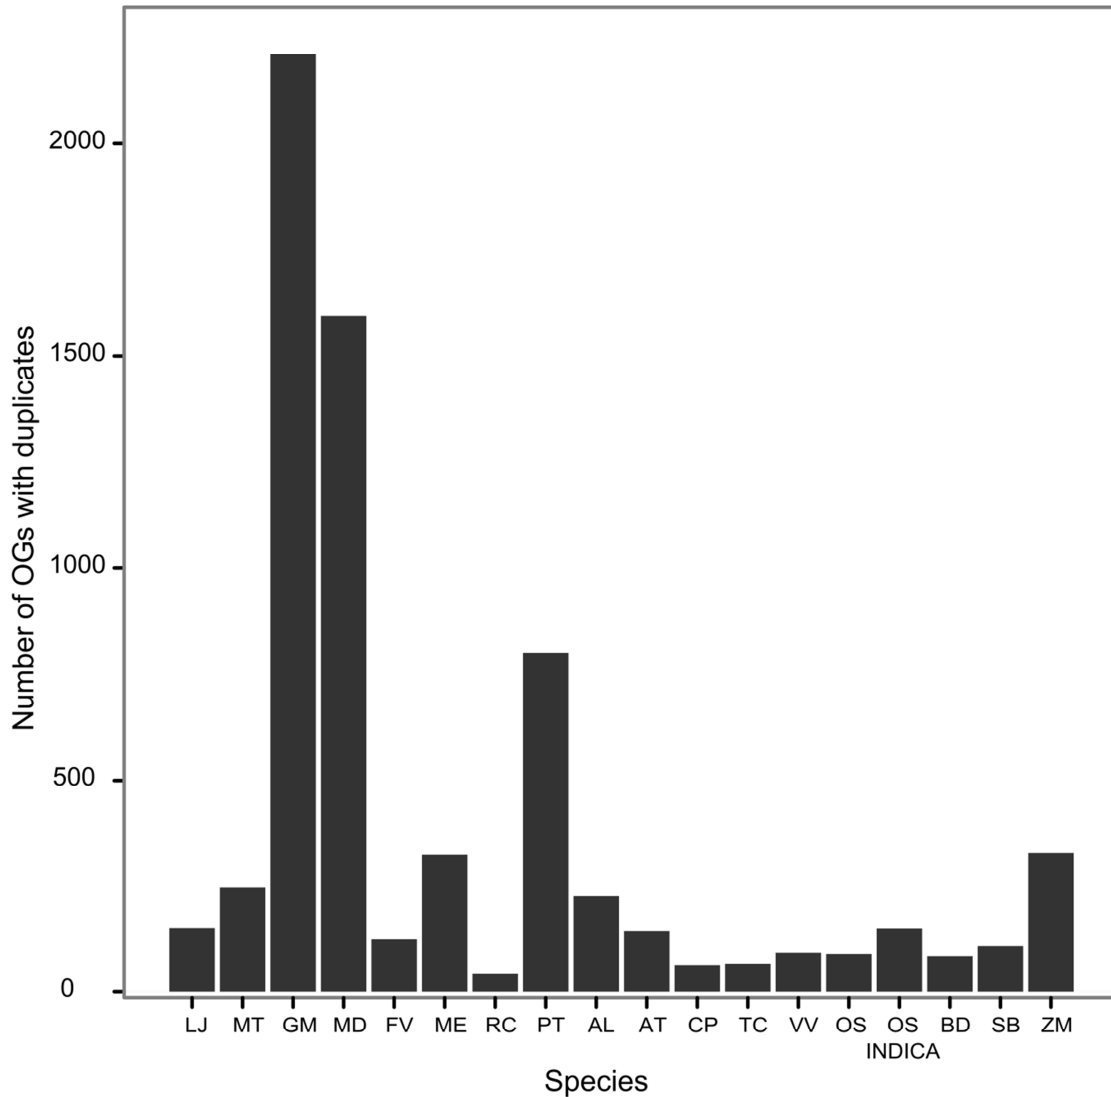

Fig. S6. Bias in duplicate content of strict and majority single-copy OGs. Plant species included in this study (x-axis) are plotted against the number of single-copy orthologous groups (y-axis) that have duplicates for this species. (Abbreviations: VV = *Vitis vinifera*, TC = *Theobroma cacao*, CP= *Carica papaya*, AL = *Arabidopsis lyrata*, AT = *Arabidopsis thaliana*, PT = *Populus trichocarpa*, RC = *Ricinus communis*, ME = *Manihot esculenta*, FV = *Fragaria vesca*, MD = *Malus domestica*, GM = *Glycine max*, MT = *Medicago trunculata*, ZM = *Zea mays*, SB = *Sorghum bicolor*, BD = *Brachypodium distachyon*, OS\_INDICA = *Oryza sativa ssp. indica*, OS = *Oryza sativa ssp. japonica*).

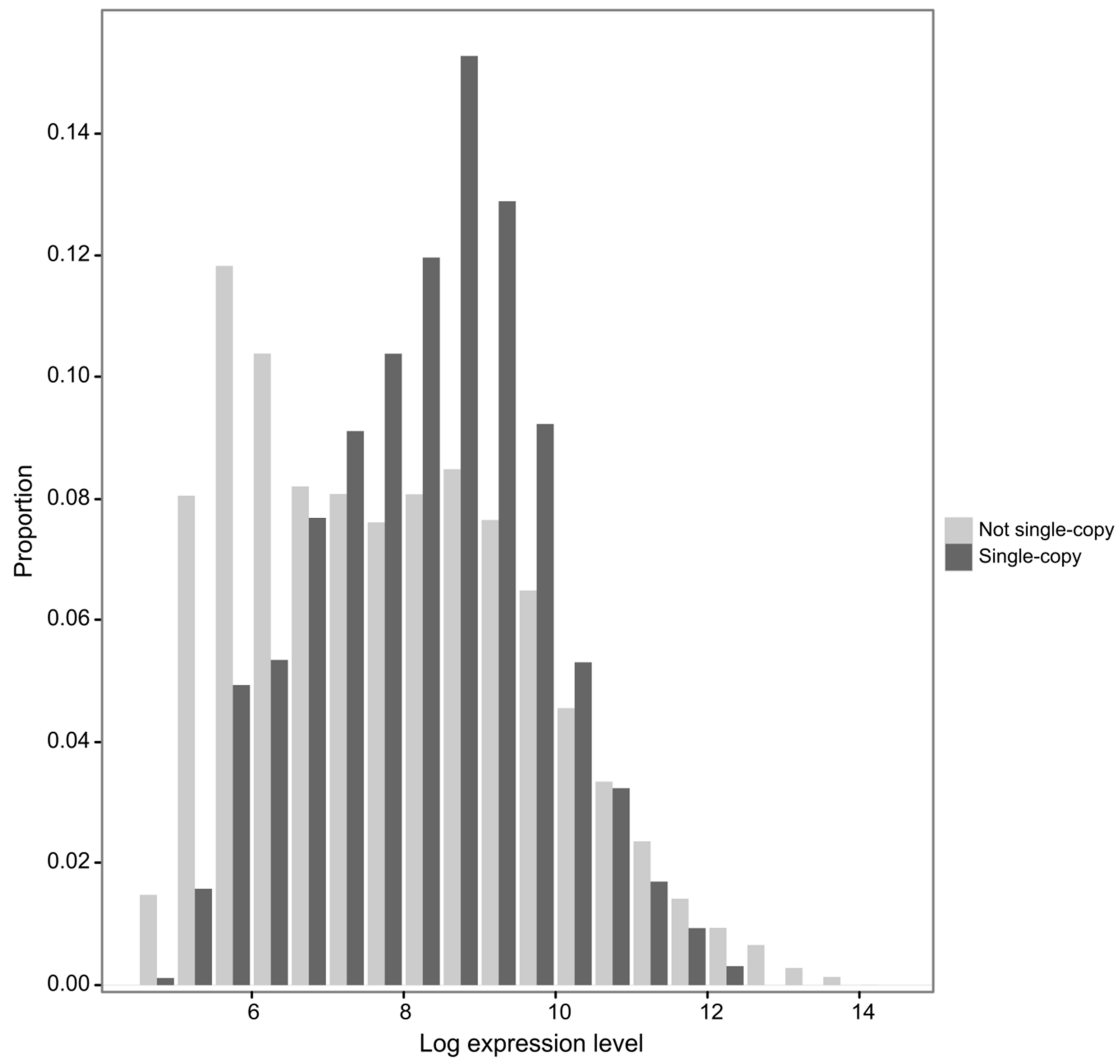

Fig. S7. Absolute expression levels for *A. thaliana* genes in single-copy and non-single-copy OGs, with genes assigned to the photosynthesis GO-category removed from the set. The figure shows the proportion of genes (y-axis) that have a certain absolute expression level (x-axis), calculated as the geometric mean of all expression measurements of a certain gene.

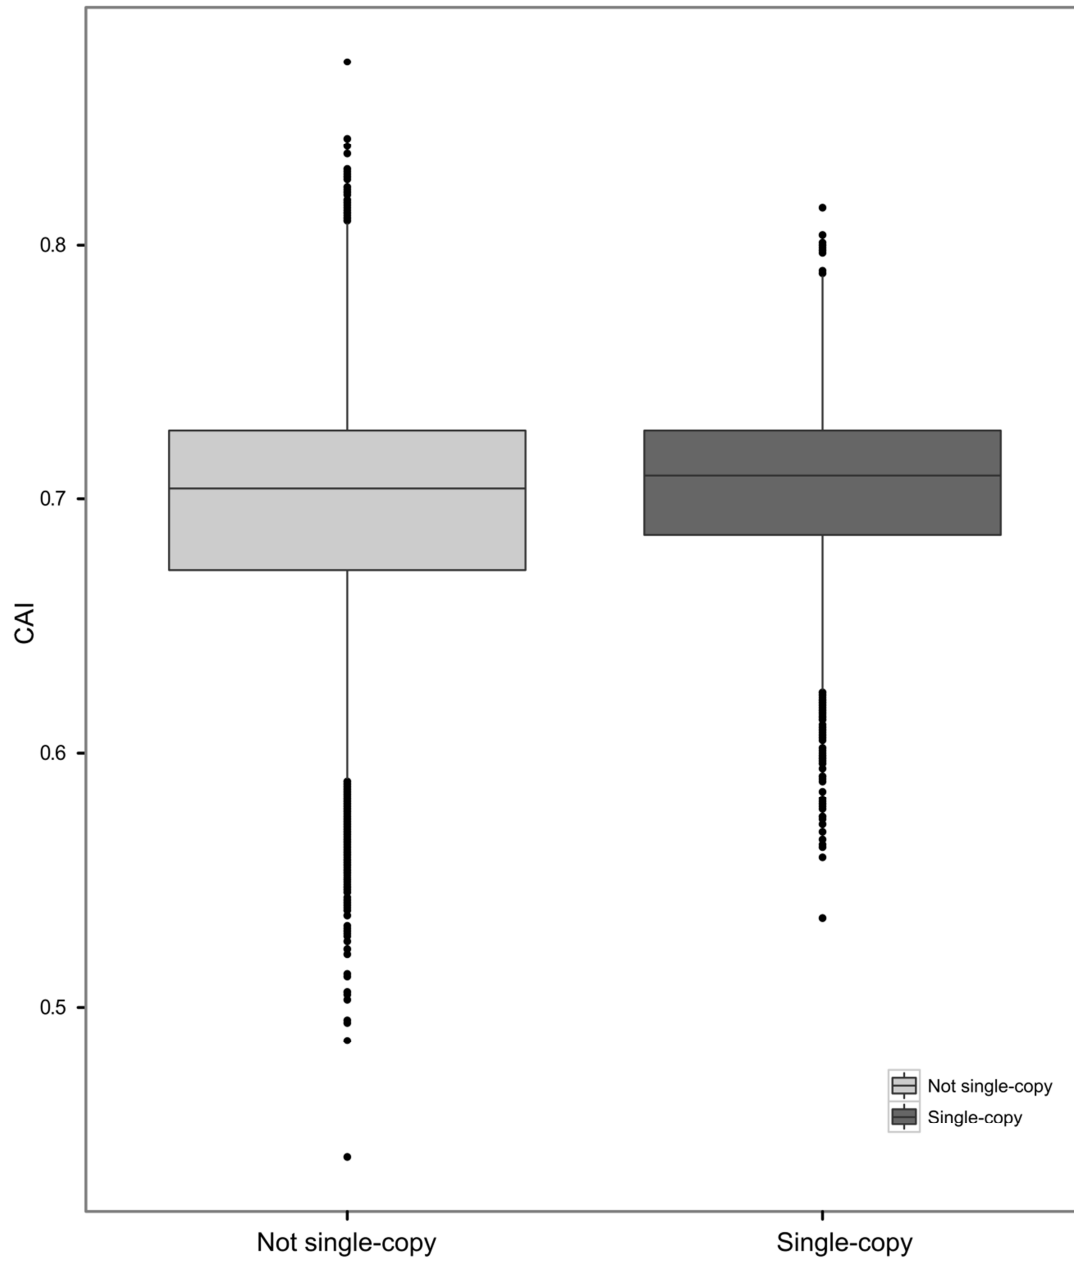

Fig. S8. Codon Adaptation Index (CAI) for single-copy genes and genes that are not single-copy in *A. thaliana*.

## Supplementary tables

Table S1. Statistical significance of (adjusted p-value) over- and underrepresentation of GO-categories for 'strictly' single-copy genes. Here all *A. thaliana* genes included to OGs that traced back to the angiosperm common ancestor were used as a background for the hypergeometric test, instead of all *A. thaliana* genes.

|                          | GO-term                         | Ontology | Adjusted p-value (FDR < 0.05) | # single-copy genes | # of <i>A. thaliana</i> genes |
|--------------------------|---------------------------------|----------|-------------------------------|---------------------|-------------------------------|
| <b>Overrepresented</b>   | DNA repair                      | BP       | 6.74E-11                      | 64                  | 117                           |
|                          | Response to DNA damage stimulus | BP       | 8.22E-11                      | 66                  | 123                           |
|                          | DNA recombination               | BP       | 2.99E-7                       | 28                  | 41                            |
|                          | DNA metabolic process           | BP       | 5.59E-14                      | 114                 | 293                           |
|                          | DNA replication                 | BP       | 1.04E-2                       | 32                  | 74                            |
|                          | Plastid organization            | BP       | 4.16E-4                       | 39                  | 84                            |
|                          | Photosynthesis                  | BP       | 3.17E-3                       | 40                  | 94                            |
|                          | Meiosis I                       | BP       | 8.36E-3                       | 15                  | 25                            |
|                          | Chloroplast                     | CC       | 6.16E-33                      | 538                 | 1544                          |
| <b>Under represented</b> | Regulation of transcription     | BP       | 2.31E-11                      | 63                  | 552                           |
|                          | Regulation of gene expression   | BP       | 3.68E-10                      | 82                  | 638                           |
|                          | Phosphorylation                 | BP       | 1.89E-17                      | 51                  | 567                           |

Table S2. Statistical significance of (adjusted p-value) over- and underrepresentation of GO-categories for 'strictly' single-copy genes.

|                        | GO-term                         | Ontology | Adjusted p-value (FDR < 0.05) | # single-copy genes | # of <i>A. thaliana</i> genes |
|------------------------|---------------------------------|----------|-------------------------------|---------------------|-------------------------------|
| <b>Overrepresented</b> | DNA repair                      | BP       | 2.7298E-8                     | 64                  | 154                           |
|                        | Response to DNA damage stimulus | BP       | 5.1921E-9                     | 13                  | 163                           |
|                        | DNA recombination               | BP       | 1.0031E-7                     | 8                   | 52                            |
|                        | DNA metabolic process           | BP       | 3.1052E-10                    | 18                  | 311                           |
|                        | Meiosis I                       | BP       | 1.0299E-3                     | 4                   | 30                            |



Table S3. Phylogenetic distribution of the *A. thaliana* single-copy genes according to HomoloGene homology relationships. An *A. thaliana* gene was denoted to belong to a certain phylostratum if it showed homology relationships to at least 70% of the species belonging to that stratum. P-values were calculated by hypergeometric test (FDR adjusted p-value < 0.05) .

| Phylostratum | # single-copy with homolog in phylostratum/# single-copy in Homologene | # <i>A. thaliana</i> genes with homolog in phylostratum/# <i>A. thaliana</i> genes in Homologene | Adjusted p-value (FDR) |
|--------------|------------------------------------------------------------------------|--------------------------------------------------------------------------------------------------|------------------------|
| All          | 231/2661                                                               | 1290/19935                                                                                       | 1.50e-06               |
| Metazoa      | 675/2661                                                               | 3514/19935                                                                                       | <2.22e-16              |
| Fungi        | 301/2661                                                               | 1807/19935                                                                                       | 1.41e-05               |

Table S4. Gene expression and sequence conservation analysis of the strictly single-copy genes. For each of the properties values for the set of strictly single-copy genes was compared to those of non single-copy genes.

| Property                | p-value (one-sided Mann-Whitney U-test) |
|-------------------------|-----------------------------------------|
| Gene expression level   | 0.6491                                  |
| Gene expression breadth | 0.0134                                  |
| $K_s$                   | 9.99e-05                                |
| $K_a$                   | 0.00017                                 |

Table S5. Significantly overrepresented GO categories among *A. thaliana* single-copy OG member genes (hypergeometric test, FDR adjusted p-value < 0.05).

| GO-term                                                               | Ontology | Adjusted p-value | #single-copy genes | # <i>A. thaliana</i> genes |
|-----------------------------------------------------------------------|----------|------------------|--------------------|----------------------------|
| nitrogen compound metabolic process                                   | BP       | 3.3944E-49       | 359                | 1548                       |
| cellular nitrogen compound metabolic process                          | BP       | 5.3436E-49       | 348                | 1484                       |
| nucleic acid metabolic process                                        | BP       | 1.6422E-42       | 234                | 866                        |
| nucleobase, nucleoside, nucleotide and nucleic acid metabolic process | BP       | 2.7937E-42       | 273                | 1104                       |
| DNA metabolic process                                                 | BP       | 6.3775E-33       | 114                | 311                        |
| DNA repair                                                            | BP       | 1.8137E-21       | 64                 | 154                        |
| response to DNA damage stimulus                                       | BP       | 1.8137E-21       | 66                 | 163                        |

|                                   |    |            |     |      |
|-----------------------------------|----|------------|-----|------|
| metabolic process                 | BP | 2.7354E-16 | 896 | 6834 |
| RNA metabolic process             | BP | 9.8850E-14 | 115 | 510  |
| cellular metabolic process        | BP | 1.2509E-13 | 721 | 5407 |
| DNA recombination                 | BP | 1.3949E-12 | 28  | 52   |
| plastid organization              | BP | 1.5284E-11 | 39  | 102  |
| organelle organization            | BP | 6.2101E-11 | 110 | 526  |
| photosynthesis                    | BP | 1.2060E-10 | 40  | 113  |
| cellular response to stress       | BP | 1.4844E-10 | 84  | 364  |
| cofactor metabolic process        | BP | 4.0235E-10 | 59  | 219  |
| cellular component organization   | BP | 4.0292E-10 | 165 | 935  |
| cofactor biosynthetic process     | BP | 1.2834E-8  | 41  | 135  |
| photosynthesis, light reaction    | BP | 1.6778E-8  | 26  | 63   |
| DNA replication                   | BP | 4.9269E-8  | 32  | 94   |
| tetrapyrrole metabolic process    | BP | 6.1330E-8  | 25  | 62   |
| heterocycle metabolic process     | BP | 9.5825E-8  | 73  | 340  |
| porphyrin metabolic process       | BP | 1.4869E-7  | 24  | 60   |
| RNA processing                    | BP | 8.1484E-7  | 70  | 337  |
| double-strand break repair        | BP | 8.3345E-7  | 14  | 24   |
| cellular process                  | BP | 8.3345E-7  | 888 | 7393 |
| chloroplast organization          | BP | 8.3345E-7  | 24  | 65   |
| embryonic development             | BP | 1.0020E-6  | 83  | 429  |
| DNA-dependent DNA replication     | BP | 1.2809E-6  | 19  | 44   |
| tRNA processing                   | BP | 1.3235E-6  | 18  | 40   |
| vitamin biosynthetic process      | BP | 1.6502E-6  | 22  | 58   |
| tRNA metabolic process            | BP | 1.7376E-6  | 30  | 98   |
| heterocycle biosynthetic process  | BP | 1.8145E-6  | 34  | 120  |
| meiosis I                         | BP | 3.0321E-6  | 15  | 30   |
| pseudouridine synthesis           | BP | 5.2235E-6  | 11  | 17   |
| tetrapyrrole biosynthetic process | BP | 5.6178E-6  | 19  | 48   |

|                                               |    |           |     |      |
|-----------------------------------------------|----|-----------|-----|------|
| vitamin metabolic process                     | BP | 7.7600E-6 | 22  | 63   |
| primary metabolic process                     | BP | 1.2007E-5 | 695 | 5719 |
| M phase of meiotic cell cycle                 | BP | 2.4023E-5 | 17  | 43   |
| meiosis                                       | BP | 2.4023E-5 | 17  | 43   |
| porphyrin biosynthetic process                | BP | 3.4510E-5 | 17  | 44   |
| pigment metabolic process                     | BP | 6.0216E-5 | 26  | 92   |
| cellular macromolecule metabolic process      | BP | 7.0722E-5 | 461 | 3667 |
| macromolecule metabolic process               | BP | 8.4860E-5 | 507 | 4086 |
| M phase                                       | BP | 9.6980E-5 | 20  | 62   |
| embryonic development ending in seed dormancy | BP | 9.8930E-5 | 68  | 372  |
| cellular response to stimulus                 | BP | 1.1586E-4 | 115 | 729  |
| chlorophyll metabolic process                 | BP | 1.4052E-4 | 15  | 39   |
| protein complex biogenesis                    | BP | 1.8625E-4 | 32  | 134  |
| protein complex assembly                      | BP | 1.8625E-4 | 32  | 134  |
| chromosome organization involved in meiosis   | BP | 1.9031E-4 | 10  | 19   |
| synapsis                                      | BP | 1.9031E-4 | 10  | 19   |
| cellular nitrogen compound catabolic process  | BP | 2.0833E-4 | 11  | 23   |
| cellular protein complex assembly             | BP | 2.1486E-4 | 23  | 82   |
| heterocycle catabolic process                 | BP | 2.9991E-4 | 12  | 28   |
| carotenoid metabolic process                  | BP | 2.9991E-4 | 12  | 28   |
| tetraterpenoid metabolic process              | BP | 2.9991E-4 | 12  | 28   |
| chloroplast fission                           | BP | 3.2750E-4 | 8   | 13   |
| chiasma assembly                              | BP | 3.2750E-4 | 8   | 13   |
| ncRNA metabolic process                       | BP | 3.6869E-4 | 41  | 198  |
| fruit development                             | BP | 4.4823E-4 | 77  | 459  |
| cell cycle process                            | BP | 4.4893E-4 | 29  | 122  |
| cell cycle phase                              | BP | 4.7084E-4 | 21  | 75   |
| seed development                              | BP | 4.7084E-4 | 74  | 438  |
| carotenoid biosynthetic process               | BP | 4.7084E-4 | 10  | 21   |

|                                                 |    |           |     |      |
|-------------------------------------------------|----|-----------|-----|------|
| tetraterpenoid biosynthetic process             | BP | 4.7084E-4 | 10  | 21   |
| small molecule metabolic process                | BP | 4.8210E-4 | 175 | 1248 |
| pigment biosynthetic process                    | BP | 5.4696E-4 | 21  | 76   |
| cellular component assembly                     | BP | 5.7005E-4 | 49  | 258  |
| chromosome organization                         | BP | 6.0108E-4 | 42  | 210  |
| ncRNA processing                                | BP | 6.7313E-4 | 31  | 138  |
| water-soluble vitamin biosynthetic process      | BP | 7.0363E-4 | 15  | 45   |
| DNA-dependent DNA replication initiation        | BP | 7.2688E-4 | 7   | 11   |
| meiotic cell cycle                              | BP | 7.3583E-4 | 18  | 61   |
| cellular nitrogen compound biosynthetic process | BP | 7.5541E-4 | 65  | 378  |
| phospholipid biosynthetic process               | BP | 7.8996E-4 | 17  | 56   |
| plastid fission                                 | BP | 9.9732E-4 | 8   | 15   |
| protein amino acid lipidation                   | BP | 9.9732E-4 | 8   | 15   |
| lipoprotein metabolic process                   | BP | 9.9732E-4 | 8   | 15   |
| lipoprotein biosynthetic process                | BP | 9.9732E-4 | 8   | 15   |
| reciprocal meiotic recombination                | BP | 1.7906E-3 | 8   | 16   |
| photosynthetic electron transport chain         | BP | 2.3783E-3 | 10  | 25   |
| water-soluble vitamin metabolic process         | BP | 2.4154E-3 | 15  | 50   |
| regulation of DNA repair                        | BP | 2.5207E-3 | 4   | 4    |
| fat-soluble vitamin metabolic process           | BP | 2.6470E-3 | 7   | 13   |
| fat-soluble vitamin biosynthetic process        | BP | 2.6470E-3 | 7   | 13   |
| photosynthesis, light harvesting                | BP | 2.6470E-3 | 9   | 21   |
| RNA modification                                | BP | 3.0190E-3 | 25  | 111  |
| regulation of DNA metabolic process             | BP | 3.2310E-3 | 10  | 26   |
| cell cycle                                      | BP | 3.6064E-3 | 31  | 152  |
| Group II intron splicing                        | BP | 4.1344E-3 | 5   | 7    |
| DNA catabolic process                           | BP | 4.1344E-3 | 5   | 7    |
| carotene biosynthetic process                   | BP | 4.1344E-3 | 5   | 7    |
| cytochrome complex assembly                     | BP | 4.4274E-3 | 7   | 14   |

|                                                         |    |           |     |     |
|---------------------------------------------------------|----|-----------|-----|-----|
| coenzyme metabolic process                              | BP | 6.6150E-3 | 28  | 137 |
| base-excision repair                                    | BP | 6.6683E-3 | 8   | 19  |
| GPI anchor metabolic process                            | BP | 6.8068E-3 | 6   | 11  |
| photosynthetic electron transport in photosystem I      | BP | 7.1051E-3 | 7   | 15  |
| protein amino acid deacetylation                        | BP | 7.1051E-3 | 7   | 15  |
| mismatch repair                                         | BP | 7.1051E-3 | 7   | 15  |
| chromatin modification                                  | BP | 7.4468E-3 | 20  | 86  |
| macromolecular complex subunit organization             | BP | 7.4468E-3 | 39  | 216 |
| protein repair                                          | BP | 8.7477E-3 | 5   | 8   |
| photosystem II repair                                   | BP | 8.7477E-3 | 5   | 8   |
| GPI anchor biosynthetic process                         | BP | 8.7477E-3 | 5   | 8   |
| mRNA modification                                       | BP | 8.7477E-3 | 4   | 5   |
| lipid A biosynthetic process                            | BP | 8.7477E-3 | 4   | 5   |
| phyloquinone biosynthetic process                       | BP | 8.7477E-3 | 4   | 5   |
| phyloquinone metabolic process                          | BP | 8.7477E-3 | 4   | 5   |
| meiotic DNA double-strand break formation               | BP | 8.7477E-3 | 4   | 5   |
| lipid A metabolic process                               | BP | 8.7477E-3 | 4   | 5   |
| organophosphate metabolic process                       | BP | 1.0123E-2 | 21  | 95  |
| reproductive structure development                      | BP | 1.0123E-2 | 104 | 735 |
| coenzyme biosynthetic process                           | BP | 1.0123E-2 | 17  | 70  |
| histidine family amino acid metabolic process           | BP | 1.0123E-2 | 6   | 12  |
| double-strand break repair via homologous recombination | BP | 1.0123E-2 | 6   | 12  |
| recombinational repair                                  | BP | 1.0123E-2 | 6   | 12  |
| histidine metabolic process                             | BP | 1.0123E-2 | 6   | 12  |
| carotene metabolic process                              | BP | 1.0123E-2 | 6   | 12  |
| phospholipid metabolic process                          | BP | 1.0124E-2 | 20  | 89  |
| pyridine nucleotide metabolic process                   | BP | 1.1348E-2 | 11  | 36  |
| positive regulation of catalytic activity               | BP | 1.2126E-2 | 10  | 31  |

|                                                                   |    |           |    |     |
|-------------------------------------------------------------------|----|-----------|----|-----|
| chlorophyll biosynthetic process                                  | BP | 1.2314E-2 | 9  | 26  |
| glycoprotein metabolic process                                    | BP | 1.4114E-2 | 15 | 60  |
| positive regulation of molecular function                         | BP | 1.5369E-2 | 10 | 32  |
| nicotinamide nucleotide metabolic process                         | BP | 1.5369E-2 | 10 | 32  |
| histone deacetylation                                             | BP | 1.5369E-2 | 6  | 13  |
| photoreactive repair                                              | BP | 1.5369E-2 | 3  | 3   |
| maintenance of fidelity involved in DNA-dependent DNA replication | BP | 1.5369E-2 | 3  | 3   |
| pyrimidine dimer repair                                           | BP | 1.5369E-2 | 3  | 3   |
| NADH dehydrogenase complex (plastoquinone) assembly               | BP | 1.5369E-2 | 3  | 3   |
| NADH dehydrogenase complex assembly                               | BP | 1.5369E-2 | 3  | 3   |
| transcription from plastid promoter                               | BP | 1.5369E-2 | 3  | 3   |
| protein folding                                                   | BP | 1.6981E-2 | 33 | 184 |
| cellular macromolecular complex subunit organization              | BP | 1.8007E-2 | 30 | 163 |
| lipopolysaccharide biosynthetic process                           | BP | 1.9090E-2 | 4  | 6   |
| lipopolysaccharide metabolic process                              | BP | 1.9090E-2 | 4  | 6   |
| cytochrome b6f complex assembly                                   | BP | 1.9090E-2 | 4  | 6   |
| vitamin K biosynthetic process                                    | BP | 1.9090E-2 | 4  | 6   |
| vitamin K metabolic process                                       | BP | 1.9090E-2 | 4  | 6   |
| cellular ketone metabolic process                                 | BP | 2.0616E-2 | 89 | 630 |
| covalent chromatin modification                                   | BP | 2.1017E-2 | 15 | 63  |
| protein amino acid alkylation                                     | BP | 2.2745E-2 | 10 | 34  |
| protein amino acid methylation                                    | BP | 2.2745E-2 | 10 | 34  |
| histidine biosynthetic process                                    | BP | 2.3840E-2 | 5  | 10  |
| histidine family amino acid biosynthetic process                  | BP | 2.3840E-2 | 5  | 10  |
| photosystem II assembly                                           | BP | 2.3840E-2 | 5  | 10  |
| translational termination                                         | BP | 2.3840E-2 | 5  | 10  |
| oxidoreduction coenzyme metabolic process                         | BP | 2.4044E-2 | 11 | 40  |

---

|                                                                       |    |           |     |     |
|-----------------------------------------------------------------------|----|-----------|-----|-----|
| methylation                                                           | BP | 2.4398E-2 | 17  | 77  |
| organic acid metabolic process                                        | BP | 2.7352E-2 | 87  | 621 |
| response to UV                                                        | BP | 2.7352E-2 | 15  | 65  |
| regulation of response to stress                                      | BP | 2.7686E-2 | 17  | 78  |
| post-embryonic development                                            | BP | 2.8889E-2 | 118 | 884 |
| small molecule catabolic process                                      | BP | 3.1638E-2 | 29  | 163 |
| regulation of cellular response to stress                             | BP | 3.1638E-2 | 6   | 15  |
| cellular amino acid metabolic process                                 | BP | 3.1638E-2 | 47  | 300 |
| histone modification                                                  | BP | 3.2601E-2 | 14  | 60  |
| macromolecular complex assembly                                       | BP | 3.3405E-2 | 34  | 201 |
| organelle fission                                                     | BP | 3.4303E-2 | 12  | 48  |
| cell cycle checkpoint                                                 | BP | 3.4897E-2 | 4   | 7   |
| tRNA modification                                                     | BP | 3.4897E-2 | 4   | 7   |
| nucleobase, nucleoside and nucleotide catabolic process               | BP | 3.4897E-2 | 4   | 7   |
| nucleobase, nucleoside, nucleotide and nucleic acid catabolic process | BP | 3.4897E-2 | 4   | 7   |
| oxoacid metabolic process                                             | BP | 3.4897E-2 | 86  | 620 |
| carboxylic acid metabolic process                                     | BP | 3.4897E-2 | 86  | 620 |
| peroxisomal transport                                                 | BP | 3.5019E-2 | 5   | 11  |
| protein targeting to peroxisome                                       | BP | 3.5019E-2 | 5   | 11  |
| negative regulation of DNA metabolic process                          | BP | 3.5019E-2 | 5   | 11  |
| cellular amine metabolic process                                      | BP | 3.6262E-2 | 50  | 327 |
| response to ionizing radiation                                        | BP | 4.2370E-2 | 6   | 16  |
| protein amino acid N-linked glycosylation                             | BP | 4.2697E-2 | 7   | 21  |
| electron transport chain                                              | BP | 4.2848E-2 | 13  | 56  |
| leucine catabolic process                                             | BP | 4.2848E-2 | 3   | 4   |
| glycoprotein catabolic process                                        | BP | 4.2848E-2 | 3   | 4   |
| nucleobase catabolic process                                          | BP | 4.2848E-2 | 3   | 4   |

---

|                                                |    |             |      |      |
|------------------------------------------------|----|-------------|------|------|
| cellular lipid metabolic process               | BP | 4.5662E-2   | 59   | 404  |
| generation of precursor metabolites and energy | BP | 4.6681E-2   | 33   | 199  |
| one-carbon metabolic process                   | BP | 4.8169E-2   | 19   | 97   |
| regulation of flower development               | BP | 4.8169E-2   | 20   | 104  |
| peroxisome organization                        | BP | 4.8827E-2   | 8    | 27   |
| cellular protein complex disassembly           | BP | 4.9389E-2   | 5    | 12   |
| nucleotide-excision repair                     | BP | 4.9389E-2   | 5    | 12   |
| tetrapyrrole catabolic process                 | BP | 4.9389E-2   | 5    | 12   |
| porphyrin catabolic process                    | BP | 4.9389E-2   | 5    | 12   |
| pteridine and derivative biosynthetic process  | BP | 4.9389E-2   | 5    | 12   |
| xanthophyll metabolic process                  | BP | 4.9389E-2   | 5    | 12   |
| cellular macromolecular complex disassembly    | BP | 4.9389E-2   | 5    | 12   |
| plastid                                        | CC | 0.0000E-100 | 551  | 2139 |
| chloroplast                                    | CC | 0.0000E-100 | 538  | 2070 |
| cytoplasmic part                               | CC | 3.2208E-84  | 799  | 4323 |
| cytoplasm                                      | CC | 1.6016E-81  | 844  | 4745 |
| intracellular                                  | CC | 1.1341E-72  | 1100 | 7208 |
| intracellular part                             | CC | 5.3956E-64  | 1044 | 6908 |
| intracellular organelle                        | CC | 6.9580E-63  | 951  | 6090 |
| organelle                                      | CC | 6.9580E-63  | 951  | 6091 |
| intracellular membrane-bounded organelle       | CC | 2.5746E-61  | 910  | 5766 |
| membrane-bounded organelle                     | CC | 2.5746E-61  | 910  | 5767 |
| plastid part                                   | CC | 1.1143E-53  | 231  | 782  |
| chloroplast part                               | CC | 2.5780E-49  | 219  | 755  |
| thylakoid                                      | CC | 1.0171E-34  | 115  | 322  |
| intracellular organelle part                   | CC | 1.4528E-32  | 364  | 1970 |
| organelle part                                 | CC | 1.6880E-32  | 364  | 1972 |



|                                |    |            |      |       |
|--------------------------------|----|------------|------|-------|
| organelle subcompartment       | CC | 1.7274E-29 | 94   | 256   |
| chloroplast thylakoid          | CC | 4.1071E-29 | 93   | 254   |
| plastid thylakoid              | CC | 4.1071E-29 | 93   | 254   |
| thylakoid part                 | CC | 8.8678E-29 | 95   | 266   |
| photosynthetic membrane        | CC | 1.0006E-19 | 74   | 227   |
| plastid stroma                 | CC | 4.2381E-19 | 96   | 354   |
| thylakoid membrane             | CC | 7.6313E-19 | 72   | 224   |
| plastid thylakoid membrane     | CC | 1.4477E-18 | 69   | 211   |
| chloroplast thylakoid membrane | CC | 1.4477E-18 | 69   | 211   |
| cell part                      | CC | 7.8143E-18 | 1353 | 11708 |
| cell                           | CC | 7.8143E-18 | 1353 | 11708 |
| chloroplast stroma             | CC | 3.9687E-15 | 85   | 335   |
| thylakoid lumen                | CC | 2.2323E-14 | 34   | 74    |
| chloroplast envelope           | CC | 3.8824E-13 | 85   | 361   |
| chloroplast thylakoid lumen    | CC | 1.2761E-12 | 28   | 58    |
| plastid thylakoid lumen        | CC | 1.2761E-12 | 28   | 58    |
| plastid envelope               | CC | 1.3336E-12 | 87   | 382   |
| envelope                       | CC | 4.7322E-9  | 109  | 601   |
| organelle envelope             | CC | 4.7322E-9  | 109  | 601   |
| nucleoid                       | CC | 3.8088E-8  | 17   | 34    |
| plastid inner membrane         | CC | 1.0878E-7  | 18   | 40    |
| chromosome                     | CC | 6.5736E-7  | 39   | 158   |
| chloroplast inner membrane     | CC | 1.2770E-6  | 16   | 37    |
| cytoplasmic chromosome         | CC | 1.2770E-6  | 11   | 18    |
| plastid chromosome             | CC | 1.2770E-6  | 11   | 18    |
| plastid membrane               | CC | 1.4929E-6  | 24   | 76    |
| plastid nucleoid               | CC | 1.8369E-6  | 12   | 22    |
| mitochondrion                  | CC | 3.6194E-6  | 126  | 817   |
| chloroplast membrane           | CC | 5.2232E-6  | 21   | 65    |

|                                               |    |           |     |      |
|-----------------------------------------------|----|-----------|-----|------|
| CUL4 RING ubiquitin ligase complex            | CC | 1.5258E-5 | 29  | 115  |
| NAD(P)H dehydrogenase complex (plastoquinone) | CC | 6.2898E-5 | 7   | 10   |
| plastoglobule                                 | CC | 1.0684E-4 | 17  | 55   |
| cullin-RING ubiquitin ligase complex          | CC | 3.6023E-4 | 31  | 148  |
| protein complex                               | CC | 4.7209E-4 | 147 | 1084 |
| replication fork                              | CC | 2.7463E-3 | 5   | 8    |
| extrinsic to membrane                         | CC | 2.8124E-3 | 19  | 83   |
| photosystem                                   | CC | 5.6117E-3 | 11  | 38   |
| nuclear replisome                             | CC | 5.7897E-3 | 3   | 3    |
| nuclear replication fork                      | CC | 5.7897E-3 | 3   | 3    |
| replisome                                     | CC | 5.7897E-3 | 3   | 3    |
| organelle membrane                            | CC | 6.2118E-3 | 64  | 435  |
| chloroplast stromal thylakoid                 | CC | 7.0928E-3 | 4   | 6    |
| chromosomal part                              | CC | 1.1858E-2 | 22  | 115  |
| ubiquitin ligase complex                      | CC | 1.2623E-2 | 36  | 221  |
| organelle inner membrane                      | CC | 1.3429E-2 | 32  | 191  |
| origin recognition complex                    | CC | 1.4081E-2 | 4   | 7    |
| endoplasmic reticulum part                    | CC | 1.4081E-2 | 14  | 62   |
| subs synaptic reticulum                       | CC | 1.4081E-2 | 14  | 62   |
| heterotrimeric G-protein complex              | CC | 2.1892E-2 | 14  | 65   |
| nuclear chromosome                            | CC | 2.4196E-2 | 8   | 28   |
| prefoldin complex                             | CC | 2.4237E-2 | 4   | 8    |
| photosystem II                                | CC | 2.7373E-2 | 7   | 23   |
| extrinsic to plasma membrane                  | CC | 2.7373E-2 | 14  | 67   |
| chromosome, centromeric region                | CC | 2.9799E-2 | 5   | 13   |
| voltage-gated potassium channel complex       | CC | 3.7342E-2 | 3   | 5    |
| potassium channel complex                     | CC | 3.7342E-2 | 3   | 5    |
| cation channel complex                        | CC | 3.7342E-2 | 3   | 5    |
| ion channel complex                           | CC | 3.7342E-2 | 3   | 5    |

|                                                                                         |    |            |     |      |
|-----------------------------------------------------------------------------------------|----|------------|-----|------|
| CAAX-protein geranylgeranyltransferase complex                                          | CC | 4.0308E-2  | 2   | 2    |
| nitrite reductase complex [NAD(P)H]                                                     | CC | 4.0308E-2  | 2   | 2    |
| amyloplast                                                                              | CC | 4.0308E-2  | 2   | 2    |
| integral to chloroplast inner membrane                                                  | CC | 4.0308E-2  | 2   | 2    |
| integral to plastid inner membrane                                                      | CC | 4.0308E-2  | 2   | 2    |
| starch grain                                                                            | CC | 4.0308E-2  | 2   | 2    |
| catalytic activity                                                                      | MF | 2.5987E-15 | 975 | 7553 |
| nuclease activity                                                                       | MF | 5.8483E-14 | 52  | 144  |
| hydrolase activity                                                                      | MF | 4.6432E-13 | 395 | 2632 |
| hydrolase activity, acting on carbon-nitrogen (but not peptide) bonds                   | MF | 8.1729E-12 | 40  | 104  |
| hydrolase activity, acting on carbon-nitrogen (but not peptide) bonds, in linear amides | MF | 5.2792E-11 | 28  | 58   |
| helicase activity                                                                       | MF | 3.8648E-8  | 45  | 160  |
| RNA methyltransferase activity                                                          | MF | 4.2909E-8  | 14  | 20   |
| endonuclease activity                                                                   | MF | 1.3794E-7  | 26  | 68   |
| purine NTP-dependent helicase activity                                                  | MF | 6.4994E-7  | 31  | 98   |
| ATP-dependent helicase activity                                                         | MF | 6.4994E-7  | 31  | 98   |
| isomerase activity                                                                      | MF | 3.3223E-6  | 47  | 198  |
| transferase activity, transferring one-carbon groups                                    | MF | 3.7077E-6  | 46  | 193  |
| methyltransferase activity                                                              | MF | 6.8496E-6  | 45  | 191  |
| hydrolase activity, acting on ester bonds                                               | MF | 2.6105E-5  | 141 | 904  |
| deacetylase activity                                                                    | MF | 4.0361E-5  | 12  | 23   |
| hydrolase activity, acting on acid anhydrides                                           | MF | 1.3496E-4  | 110 | 688  |
| hydrolase activity, acting on acid anhydrides, in phosphorus-containing anhydrides      | MF | 2.2812E-4  | 108 | 681  |
| pyrophosphatase activity                                                                | MF | 3.1805E-4  | 107 | 679  |
| peptidyl-prolyl cis-trans isomerase activity                                            | MF | 3.5601E-4  | 18  | 56   |
| nucleoside-triphosphatase activity                                                      | MF | 3.5601E-4  | 103 | 651  |
| cis-trans isomerase activity                                                            | MF | 4.3767E-4  | 18  | 57   |

|                                                                                                              |    |           |    |     |
|--------------------------------------------------------------------------------------------------------------|----|-----------|----|-----|
| ATPase activity, coupled                                                                                     | MF | 4.3767E-4 | 52 | 273 |
| iron-sulfur cluster binding                                                                                  | MF | 4.4626E-4 | 13 | 33  |
| metal cluster binding                                                                                        | MF | 4.4626E-4 | 13 | 33  |
| structure-specific DNA binding                                                                               | MF | 9.2885E-4 | 15 | 45  |
| deoxyribonuclease activity                                                                                   | MF | 9.2885E-4 | 6  | 8   |
| alpha-amylase activity                                                                                       | MF | 9.2885E-4 | 6  | 8   |
| mismatched DNA binding                                                                                       | MF | 9.2885E-4 | 7  | 11  |
| DNA-dependent ATPase activity                                                                                | MF | 9.8769E-4 | 12 | 31  |
| ribonuclease activity                                                                                        | MF | 1.0790E-3 | 18 | 62  |
| acetyltransferase activity                                                                                   | MF | 1.0790E-3 | 18 | 62  |
| double-stranded DNA binding                                                                                  | MF | 1.8480E-3 | 12 | 33  |
| phosphogluconate dehydrogenase (decarboxylating) activity                                                    | MF | 2.1488E-3 | 6  | 9   |
| translation termination factor activity                                                                      | MF | 3.2024E-3 | 7  | 13  |
| translation release factor activity                                                                          | MF | 3.2024E-3 | 7  | 13  |
| exonuclease activity                                                                                         | MF | 3.8354E-3 | 14 | 46  |
| histone deacetylase activity                                                                                 | MF | 5.2144E-3 | 8  | 18  |
| protein deacetylase activity                                                                                 | MF | 5.2144E-3 | 8  | 18  |
| ATPase activity                                                                                              | MF | 5.2144E-3 | 55 | 328 |
| endonuclease activity, active with either ribo- or deoxyribonucleic acids and producing 5'-phosphomonoesters | MF | 5.3079E-3 | 11 | 32  |
| DNA helicase activity                                                                                        | MF | 7.6470E-3 | 8  | 19  |
| damaged DNA binding                                                                                          | MF | 8.9392E-3 | 9  | 24  |
| nucleotidyltransferase activity                                                                              | MF | 1.0352E-2 | 30 | 154 |
| aminoacyl-tRNA hydrolase activity                                                                            | MF | 1.0417E-2 | 5  | 8   |
| UDP-3-O-[3-hydroxymristoyl] N-acetylglucosamine deacetylase activity                                         | MF | 1.0417E-2 | 4  | 5   |
| glycogen debranching enzyme activity                                                                         | MF | 1.0417E-2 | 4  | 5   |
| N-acetyltransferase activity                                                                                 | MF | 1.4028E-2 | 13 | 47  |

|                                                           |    |           |     |      |
|-----------------------------------------------------------|----|-----------|-----|------|
| endoribonuclease activity, producing 5'-phosphomonoesters | MF | 1.5058E-2 | 10  | 31   |
| amylase activity                                          | MF | 1.7843E-2 | 7   | 17   |
| nucleotide binding                                        | MF | 1.8385E-2 | 258 | 2085 |
| macrolide binding                                         | MF | 1.8385E-2 | 8   | 22   |
| FK506 binding                                             | MF | 1.8385E-2 | 8   | 22   |
| 5'-nucleotidase activity                                  | MF | 1.8385E-2 | 3   | 3    |
| isoamylase activity                                       | MF | 1.8385E-2 | 3   | 3    |
| DNA primase activity                                      | MF | 1.8385E-2 | 3   | 3    |
| endoribonuclease activity                                 | MF | 2.6433E-2 | 12  | 45   |
| N-acyltransferase activity                                | MF | 2.6454E-2 | 13  | 51   |
| drug binding                                              | MF | 3.2259E-2 | 8   | 24   |
| DNA-directed DNA polymerase activity                      | MF | 3.2259E-2 | 8   | 24   |
| 3'-5' exonuclease activity                                | MF | 4.2467E-2 | 8   | 25   |
| selenium binding                                          | MF | 4.6324E-2 | 4   | 7    |
| ribonuclease III activity                                 | MF | 4.7043E-2 | 5   | 11   |
